# Supplementary material
Source: PubMed Central journal article supplement (PMC6081959)
Supplement: NIHMS958040-supplement-005414_graphic_abstract.pdf [file NIHMS958040-supplement-005414_graphic_abstract.pdf]

# $I_{to}$ heterogeneity potentiates EAD and reentry formation in LQT1

## Intact Heart Mapping

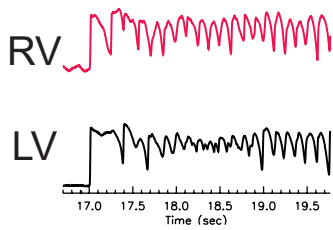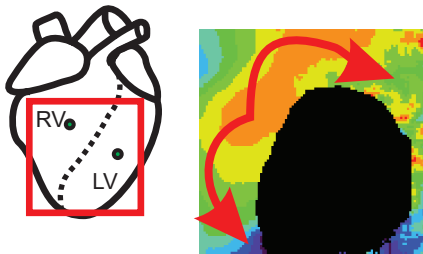

EAD originates from RV where APD is shorter and establishes reentry

## Single Myocyte

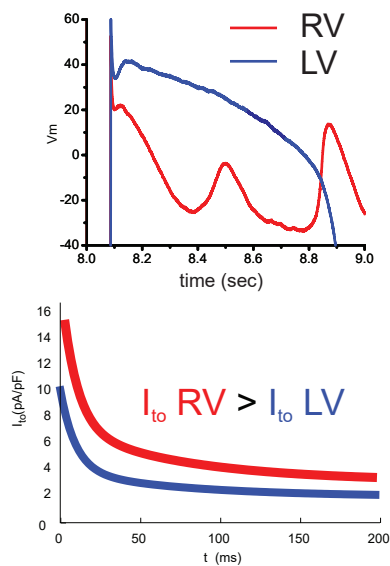

EADs form in RV myocytes where  $I_{to}$  magnitude is larger and inactivation is slow

## Simulation

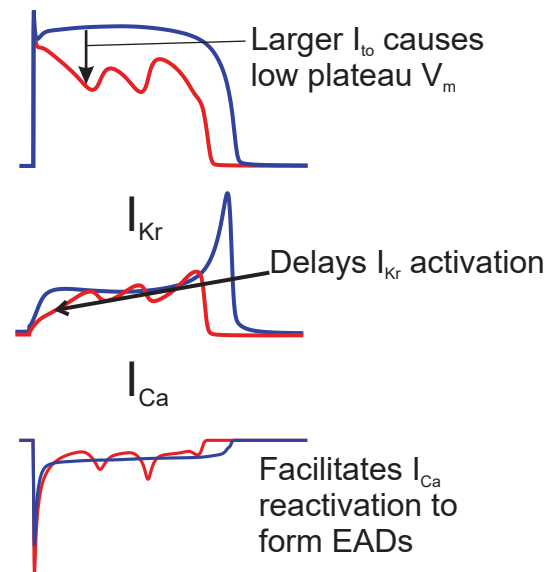

Larger  $I_{to}$  potentiates EADs by its  $V_m$ -mediated knock-on effect on  $I_{Kr}$  and  $I_{Ca}$
