# Supplementary material
Source: PubMed Central journal article supplement (PMC6081959)
Supplement: NIHMS958040-supplement-cell_cpp.pdf [file NIHMS958040-supplement-cell_cpp.pdf]

```

/*-----
 *
 * This code is based on the original UCLA model, and is modified
 * by CIRCS group of Northeastern University.
 *
 * Contact Information:
 *
 * Center for interdisciplinary research on complex systems
 * Departments of Physics, Northeastern University
 *
 * Alain Karma          a.karma (at) northeastern.edu
 * Mingwang Zhong       mingwang.zhong (at) gmail.com
 *
 * The code was used to reproduce simulations in
 * Transient outward K+ current (Ito) underlies the right ventricular
 * initiation of polymorphic ventricular tachycardia in a transgenic
 * rabbit model of long QT type 1, Bum-Rak Choi, Weiyan Li, Dmitry
 * Terentyev, Anatoli Kabkov, Mingwang Zhong, Colin M Rees, Radmila
 * Terentyeva, Tae Yun Kim, Zhilin Qu, Xuwen Peng, Alain Karma,
 * and Gideon Koren (2018).
 *----- */

// Information of original UCLA model:
/*----- UCLA Model ver 1.00 -----
 *
 * Contact Information
 *
 * Departments of Medicine (Cardiology)
 * David Geffen School of Medicine at UCLA
 *
 * Daisuke Sato          dasato (at) mednet.ucla.edu
 * Yohannes Shiferaw     yshiferaw (at) csun.edu
 * James N Weiss         JWeiss (at) mednet.ucla.edu
 *
 * The code was used to produce simulations in
 * A. Mahajan, Y. Shiferaw, D. Sato, A. Baher, R. Olcese, L.-H. Xie,
 * M.-J. Yang, P.-S. Chen, J. G. Restrepo, A. Karma, A. Garfinkel,
 * Z. Qu, and J. N. Weiss, A rabbit ventricular action potential model
 * replicating cardiac dynamics at rapid heart rates, Biophysical Journal,
 * 94 (2008), pp. 392-410.
 *----- */

#include "cell.h"
#define pow2(x) ((x)*(x))
// initial conditions
CCell::CCell(void) : y(new double[N]),

    xm(y[0]), xh(y[1]), xj(y[2]), xhl(y[3]),
    IKrC1(y[4]), IKrC2(y[5]), IKrC3(y[6]), IKrO(y[7]), IKrI(y[8]),
    xs1(y[9]), xs2(y[10]),
    ica(y[11]), hd(y[12]), hf(y[13]), hf_ca(y[14]),
    xtos(y[15]), ytos(y[16]), xtof(y[17]), ytof(y[18]),
    step(y[19]), v(y[20]),
    cp(y[21]), cs(y[22]), ci(y[23]), cj(y[24]), cjp(y[25]),
    tropi(y[26]), trops(y[27]),
    jrel(y[28]), xir(y[29]), fspark(y[30]),
    xnai(y[31])
{
    // INa
    xm = 0.001145222753; // sodium m-gate
    xh = 0.9898351676; // sodium h-gate
    xj = 0.9930817518; // soiumj-gate

    // IKr
    IKrC1 = 1; // ikr gate variable
    IKrC2 = 0;
    IKrC3 = 0;
    IKrO = 0;
    IKrI = 0;

    // IKs
    xs1 = 0.08433669901; // iks gate variable
    xs2 = 0.1412866149; // iks gate variable

```

```

// ICa
ica = -0.1; // single channel flux
hd = 0;
hf = 1;
hf_ca = 0;

// Ito
xtos = 0.01; // ito slow activation
ytos = 0.667; // ito slow inactivation
xtof = 0.003737842131; // ito fast activation
ytof = 0.9823715315; // ito slow inactivation

// other
step = 0;
dt = 0.0025; // time step
v = -86.79545769; // voltage
vold = v;

cp = 0.182601371; // averaged dyadic space con.
cs = 0.1205609256; // averaged submembrane conc.
ci = 0.0863687451; // myoplasm conc.
cj = 95; // 107.0388739; // NSR load
cjp = 90; // 95.76256179; // average JSR load

tropi = 29.64807803; // time dependent buffers in myplasm (troponin)
trops = 26.37726416; // time dependent buffers in submembrane (troponin)

jrel = 0;
xir = 0.006462569526; // SR current flux
fspark = 1.0;

xnai = 5.1; // internal Na conc.

#ifdef __USE_VAR_FOR_CONST
  xnao = 136.0; // mM      external Na
  xki = 140.0; // mM      internal K
  xko = 5.4; // 5.40; // mM      external K
  cao = 1.0; // 1.8; // mM      external Ca
  ek = (1.0/frt)*log(xko/xki);

  gca = 70; // ical conductance
  gtos = 0.05; // ito slow conductance // 0.05 for RV, 0.025 for LV
  gtof = 0.08; // ito fast conductance
  gnaca = 0.756; // exchanger strength
  gkr = 0.096; // Ikr conductance, MGWMN: 0.096, HH: 0.16
  gks = 0; // LMC: RV 0.17, LV 0.14
  gkl = 0.3; // Ikl conductance
  gnak = 1.5;
  vup = 0.6; // 0.4; // uptake strength
  taus = 1.5; // 0.75; // diffusional delay (ms)
// CHANGED
  gna = 12.0; // sodium conductance (mS/micro F)
  taur = 30.0; // spark lifetime (ms)
  taua = 100.0; // NSR-JSR diffusional delay (ms)
  av = 11.3;
  cstar = 90.0;
#endif
}

void CCell::Prepare(double BCL, int Iter)
{
  if (Iter==0)
  {
    double dciold = 0;
    double dciold2 = 0;
    bool first = false;
    int Tn = BCL*10000/dt, BCLn = BCL/dt, Durn = stimduration/dt;
    for (int tn = 0; tn<Tn; tn++)
    {
      double t = tn*dt;

```

```

        if (tn%BCLn < Durn)
        {
            if (first)
            {
                if (fabs(ci-dciold2)<0.00001 && t>BCL*300)
                {
                    break;
                }
                dciold2 = dciold;
                dciold = ci;
                first = false;
            }
            Pace(stim);
        }
        else
        {
            first = true;
            Pace();
        }
    }
}
else
{
    int Tn = BCL*Iter/dt, BCLn = BCL/dt, Durn = stimduration/dt;
    for (int tn = 0;tn<Tn;tn++)
    {
        if (tn%BCLn < Durn)
            Pace(stim);
        else
            Pace();
    }
}
}

CCell::~CCell()
{
    delete[] y;
}

CCell& CCell::operator=(const CCell& cell)
{
    if (&cell!=this)
    {
        for (int i=0;i<N;i++)
        {
            y[i]=cell.y[i];
        }
        vold=cell.vold;
        dt=cell.dt;

#ifdef __USE_VAR_FOR_CONST
        xnao = cell.xnao;
        xki = cell.xki;
        xko = cell.xko;
        cao = cell.cao;

        gca = cell.gca;
        gtos = cell.gtos;
        gtof = cell.gtof;
        gnaca = cell.gnaca;
        gkr = cell.gkr;
        gks = cell.gks;
        gK1 = cell.gK1;
        gnak = cell.gnak;
        vup = cell.vup;
        taus = cell.taus;
        gna = cell.gna;
        taur = cell.taur;
        taua = cell.taua;
        av = cell.av;
        cstar = cell.cstar;
#endif
    }
}

```

```

        return(*this);
    }

void CCell::ClampAP(double t, double T, double APD)
{
    const double Vmin = -80; //-80mV
    const double Vmax = 30; //30mV
    double clampv;
    if (APD==0)
    {
        const double a=2.0/3.0*1000;
        double x=a/(a+T);
        int m=(int)(t/T);
        if (m*T+x*T>t)
        {
            clampv = Vmin+(Vmax-Vmin)*sqrt(1-((t-m*T)/x/T)*((t-m*T)/x/T)
        }
        else
        {
            clampv = Vmin;
        }
    }
    else
    {
        double x = APD/T;
        int m = (int)(t/T);
        if (m*T+x*T>t)
        {
            clampv = Vmin+(Vmax-Vmin)*sqrt(1-((t-m*T)/x/T)*((t-m*T)/x/T)
        }
        else
        {
            clampv = Vmin;
        }
    }
}

double dv = (vold-v)/dt;
vold = v;
double Itotal;
if(fabs(dv)>25.0) // then finer time step when dv/dt large
{
    dtt = dt/10;
    for (int iii=0;iii<10;iii++)
    {
        v = clampv;
        Itotal = PaceX(0);
    }
}
else
{
    dtt = dt;
    v = clampv;
    Itotal = PaceX(0);
}
}

double CCell::Pace(double Istim)
{
    // ////////////////////////////////// time step adjustment //////////////////////////////////
    double dv = (vold-v)/dt;
    vold = v;
    double Itotal;
    //if(fabs(dv)>25.0) // then finer time step when dv/dt large
    if(0)
    {
        dtt = dt/10;
        for (int iii=0;iii<10;iii++)
        {
            Itotal=PaceX(Istim);
        }
    }
}

```

```

    }
    else
    {
        dtt = dt;
        Itotal = PaceX(Istim);
    }
    step++;
    return Itotal;
}

double CCell::PaceVClamp(double clampv)
{
    /////////////////////////////////////////////////////////////////// time step adjustment ///////////////////////////////////////////////////////////////////
    //
    double vold = v;
    double dv = (vold-v)/dt;
    vold = v;
    double Itotal;
    if(fabs(dv)>25.0) // then finer time step when dv/dt large
    {
        dtt = dt/10;
        for (int iii=0;iii<10;iii++)
        {
            v = clampv;
            Itotal = PaceX(0);
            v = clampv;
        }
    }
    else
    {
        dtt = dt;
        v = clampv;
        Itotal = PaceX(0);
        v = clampv;
    }
    return Itotal;
}

double CCell::PaceX(double Istim)
{
    double xik1 = comp_ik1();
    double xito = comp_ito(); //itos and itof
    double xinak = comp_inak();
    double csm = cs/1000.0; // convert micro M to mM
    double Jnaca = comp_inaca(csm);

    /////////////////////////////////////////////////////////////////// Equations for Ca cycling ///////////////////////////////////////////////////////////////////
    double xdif = (cs-ci)/taus; //diffusion from submembrane to myoplasm
    // Troponin kinetics
    const double xkon = 0.0327;
    const double xkoff = 0.0196;
    const double btrop = 70.0;
    double xbi = xkon*ci*(btrop-tropi)-xkoff*tropi;
    double xbs = xkon*cs*(btrop-trops)-xkoff*trops;

    double xiup = comp_iuptake();
    double xileak = comp_ileak();

    ica = comp_ica(csm);
    double JCa = comp_hh_ical(ica,csm);
    double xsvipca = comp_svipca(); // PMCA

    double dcs = comp_inst_buffer(cs)*(50.0*(xir-xdif-JCa+Jnaca-xsvipca/16.0)-xbs); //----with PMCA----
    double dci = comp_inst_buffer(ci)*(xdif-xiup+xileak-xbi);
    double dcj = -xir+xiup-xileak; // SR load dynamics
    double dcjp = (cj-cjp)/taua; // NSR-JSR relaxation dynamics
    double Qr = comp_Q();
    double dir = comp_dir(Qr,JCa,dcj);

    double xina = comp_ina();
    double xikr = comp_ikr();
    double xiks = comp_iks();

```

```

cs += dcs*dtt;
ci += dci*dtt;
cj += dcj*dtt;
cjp += dcjp*dtt;
xir += dir*dtt;

tropi += xbi*dtt;
trops += xbs*dtt;

////////// convert ion flow to current //////////
const double wca = 8.0; //conversion factor between micro molar/ms to micro a
mps/ micro farads
double xinaca = wca*Jnaca;
double xical = 2.0*wca*JCa;
jrel = xical;

////////// sodium dynamics //////////
const double xrr = (1.0/wca)/1000.0; // note: sodium is in m molar so need to
divide by 1000
//xnai += 100*(-xrr*(xina+3.0*xinak+3.0*xinaca))*dtt;

////////// dv/dt //////////
double Itotal = ( -( xina + xikl + xikr + xiks + xito + xinaca + xical + xin
ak /*+xsvipca*/ ) + Istim); //with PMCA
v += Itotal*dtt;

////////// output to file //////////
_inaca=xinaca; _ical=xical; _iks=xiks; _ikr=xikr;
_ikl=xikl;
_ina=xina; _inak=xinak; _iup=xiup; _svipca=xsvipca;
_up=xiup;
_ir=xir;

return Itotal;
}

////////// PMCA //////////
double CCell::comp_svipca(void)
{
double xsvipca = 0.18*1.15*cs/(3.6+cs);
return xsvipca;
}

////////// sodium current following Hund-Rudy //////////
//////////
double CCell::comp_ina(void)
{
double ena = (1.0/frt)*log(xnao/xnai);
double am;
double vdna = 0;
if (fabs(v+47.13+vdna)<0.001/0.1)
am=3.2;
else
am = 0.32*(v+47.13+vdna)/(1.0-exp(-0.1*(v+47.13+vdna)));
double bm = 0.08*exp(-(v+16+vdna)/11.0);
double ah,bh,aj,bj;
if(v<(-40.0))
{
ah = 0.135*exp((80.0+v)/(-6.8));
bh = 3.56*exp(0.079*v)+310000.0*exp(0.35*v);
aj = ((-127140.0*exp(0.2444*v)-0.00003474*exp(-0.04391*v))*(v+37.78
))/(1.0+exp(0.311*(v+79.23))); // *0.5;
bj = (0.1212*exp(-0.01052*v))/(1.0+exp(-0.1378*(v+40.14))); // *0.5;
}
else
{
ah = 0.0;
bh = 1.0/(0.13*(1.0+exp((v+10.66)/(-11.1))));
aj = 0.0;
bj = (0.3*exp(-0.000002535*v))/(1.0+exp(-0.1*(v+32.0))); // *0.5;
}

double tauh = 1.0/(ah+bh);

```

```

    double tauj = 1.0/(aj+bj);
    double taum = 1.0/(am+bm);
    double xina = gna*xh*xj*xm*xm*xm*(v-ena);

    xh = ah/(ah+bh)-((ah/(ah+bh))-xh)*exp(-dtt/tauh);
    xj = aj/(aj+bj)-((aj/(aj+bj))-xj)*exp(-dtt/tauj);
    xm = am/(am+bm)-((am/(am+bm))-xm)*exp(-dtt/taum);

    return xina;
}

//////////////////////////////////// MGWMN model, new fitted //////////////////////////////////////

double CCell::comp_ikr(void)
{
    double alpha1 = 0.007953 * exp(v/30.631250);
    double beta1 = 0.083063 * exp(-v/69.176);
    double alpha2 = 0.008511 * exp(v/21.167);
    double beta2 = 0.003242 * exp(v/95.020218);
    double alpai = 0.187367 * exp(v/1467.569512);
    double betai = 0.044965 * exp(-v/25.197271);
    double alpai2 = 0.000035 * exp(v/496052.439941);
    double sai = alpai2*betai*beta2/alpha2/alpai;
    double kf = 0.300789;
    double kb = 0.135702;

    double dc1dt = - IKrC1 * alpha1 + IKrC2 * beta1;
    double dc2dt = IKrC1 * alpha1 - IKrC2 * beta1 + IKrC3 * kb - IKrC2 * kf;
    double dc3dt = - IKrC3 * kb + IKrC2 * kf - IKrC3 * alpha2 + IKrO * beta2 - I
Krc3 * alpai2 + IKrI * sai;
    double dodt = IKrC3 * alpha2 - IKrO * beta2 + IKrI * betai - IKrO * alpha
i;
    double didt = - IKrI * betai + IKrO * alpai - IKrI * sai + IKrC3 * alpai2
;

    IKrC1 += dc1dt * dtt;
    IKrC2 += dc2dt * dtt;
    IKrC3 += dc3dt * dtt;
    IKrO += dodt * dtt;
    IKrI += didt * dtt;

    double xikr = gkr*sqrt(xko/5.4)*IKrO*(v-ek);

    return xikr;
}

//////////////////////////////////// HH model, new fitted //////////////////////////////////////
/*
double CCell::comp_ikr(void)
{
    const double gss=sqrt(xko/5.4);
    double xkrinf = 1/(1+exp(-(v+7.78)/7.14));
    double ykrinf = 1/(1+exp((v+53.5)/24.06));
    double xkrtau = 1/(1.466*(v-214.2)/(1-exp(-(v-214.2)/17.18))+0.01751*(v+58.9
3)/(exp((v+58.93)/3.779)-1));

    double xikr=gkr*gss*IKrO*IKrI*(v-ek);

    IKrO = xkrinf-(xkrinf-IKrO)*exp(-dtt/xkrtau);
    IKrI = ykrinf; // instantaneous

    return xikr;
}
*/

//////////////////////////////////// Iks modified from Shannon, with new Ca dependence //////////////////////////////////////
////////////////////////////////////
double CCell::comp_iks(void)
{
    const double prnak = 0.018330;
    double eks = (1.0/frt)*log((xko+prnak*xnao)/(xki+prnak*xnai));
    double xs1ss = 1.0/(1.0+exp(-(v-1.50)/16.70));
    double xs2ss = xs1ss; // modified

```

```

    double tausl1;
    if (fabs(v+30.0)<0.001/0.0687)
        tausl1 = 1/(0.0000719/0.148+0.000131/0.0687);
    else
        tausl1 = 1.0/(0.0000719*(v+30.0)/(1.0-exp(-0.148*(v+30.0)))+0.000131
*(v+30.0)/(exp(0.0687*(v+30.0))-1.0));
    double tausl2 = 1.0*tausl1;
    double gksx = (1+0.8/(1+pow((0.3/ci),3)));
    double xiks = gks*gksx*xs1*xs2*(v-eks);
    xs1 = xs1ss-(xs1ss-xs1)*exp(double(-dtt/tausl1));
    xs2 = xs2ss-(xs2ss-xs2)*exp(double(-dtt/tausl2));
    return xiks;
}

////////////////////////////////////// Ik1 following Luo-Rudy formulation (from Shannon model)
//////////////////////////////////////
double CCell::comp_ik1(void)
{
    const double gki = (sqrt(xko/5.4));
    double aki = 1.02/(1.0+exp(0.2385*(v-ek-59.215)));
    double bki = (0.49124*exp(0.08032*(v-ek+5.476))+exp(0.061750*(v-ek-594.31)))/
/(1.0+exp(-0.5143*(v-ek+4.753)));
    double xkin = aki/(aki+bki);
    double xik1 = gk1*gki*xkin*(v-ek);
    return xik1;
}

////////////////////////////////////// Ito slow following Shannon et. al. 2005 //////////////////////////////////
//////////////////////////////////////
double CCell::comp_ito(void)
{
    double xtoss_inf = 1/(1+exp(-(v+10.06)/13.75));
    double ytoss_inf = 1.0/(1.0+exp((v+41.97)/5.14));
    double txs = 9.0/(1.0+exp((v+3)/15.0)) + 0.5;
    double tys = 80 + 3000/(1+exp((v+60.)/10.)); // RV: 80, LV: 50
    double xitoss = gtoss*xtoss*(ytoss)*(v-ek); // ito slow
    xtoss = xtoss_inf-(xtoss_inf-xtoss)*exp(-dtt/txs);
    ytoss = ytoss_inf-(ytoss_inf-ytoss)*exp(-dtt/tys);

    double xtof_inf = xtoss_inf;
    double ytof_inf = ytoss_inf;
    double txf = 9.0/(1.0+exp((v+3)/15.0)) + 0.5;
    double tyf = 8.4 + 100/(1+exp((v+60.)/10.));
    double xitof = gtof*xtof*ytof*(v-ek); // ito fast
    xtof = xtof_inf-(xtof_inf-xtof)*exp(-dtt/txf);
    ytof = ytof_inf-(ytof_inf-ytof)*exp(-dtt/tyf);

    // output to file
    _itof=xitof; _itos=xitoss;

    return xitoss+xitof;
}

////////////////////////////////////// Inak (sodium-potassium exchanger) following Shannon ///
//////////////////////////////////////
double CCell::comp_inak(void)
{
    const double xkmko = 1.5; //these are Inak constants adjusted to fit
//the experimentally measure

d dynamic restitution curve
    const double xkmnai = 12.0;
    const double sigma = (exp(xnao/67.3)-1.0)/7.0;
    double fnak = 1.0/(1+0.1245*exp(-0.1*v*frt)+0.0365*sigma*exp(-v*frt));
    double xinak = gnak*fnak*(1./((1+(xkmnai/xnai)))*xko/(xko+xkmko));
    return xinak;
}

////////////////////////////////////// Inaca (sodium-calcium exchange) following Shannon and H
und-Rudy //////////////////////////////////
// Note: all concentrations are in mM
double CCell::comp_inaca(double csm)
{
    double zw3 = pow(xnai,3)*cao*exp(v*0.35*frt)-pow(xnao,3)*csm*exp(v*(0.35-1.))

```



```

*frt);
    double zw4 = 1.0+0.2*exp(v*(0.35-1.0)*frt);
    const double xkdna = 0.3; // micro M
    double aloss = 1.0/(1.0+pow((xkdna/cs),3));
    const double xmcao = 1.3;
    const double xmnao = 87.5;
    const double xmnai = 12.3;
    const double xmcai = 0.0036;
    double yz1 = xmcao*pow(xnai,3)+pow(xmnao,3)*csm;
    double yz2 = pow(xmnai,3)*cao*(1.0+csm/xmcai);
    double yz3 = xmcai*pow(xnao,3)*(1.0+pow((xnai/xmnai),3));
    double yz4 = pow(xnai,3)*cao+pow(xnao,3)*csm;
    double zw8 = yz1+yz2+yz3+yz4;
    double Jnaca = gnaca*aloss*zw3/(zw4*zw8);
    return Jnaca;
}

//////////////////////////////////// compute driving force: i_Ca //////////////////////////////////////
/
double CCell::comp_ica(double csm)
{
    const double pca = 0.00054;
    double za = v*2.0*frt;
    double factor1 = 4.0*pca*xf*xf/(xxr*temp);
    double factor = v*factor1;
    double ica;
    if(fabs(za)<0.001)
        ica = factor1*(csm*exp(za)-0.341*(cao))/(2.0*frt);
    else
        ica = factor*(csm*exp(za)-0.341*(cao))/(exp(za)-1.0);

    return ica;
}

//////////////////////////////////// HH Ca current //////////////////////////////////////
double CCell::comp_hh_ical(double ica,double csm)
{
    double dinf = 1/pow2(1+exp(-(v+17.6)/8.1));
    double tau_d = 0.8;
    double finf = 0.98/(1+exp((v+27.66)/4.0432))+0.5/(1+exp(-(v-41)/8.93))+0.02;
    // MGWMN IKr
    double tau_f = 75.0/(1 + exp(-(v - 30.0)/4.0)) + 25.0; // MGWMN IKr
    //double finf = 0.98/(1+exp((v+27.66)/4.0432))+0.5/(1+exp(-(v-46)/8.93))+0.0
2; // HH IKr
    //double tau_f = 43.0/(1 + exp(-(v - 30.0)/6.0)) + 25.0; // HH IKr
    double finf_ca = 0.7*exp(-csm*1000/0.42)+0.3*exp(-csm*1000/9);
    double tau_f_ca = 3;
    double JCa = gca*hd*hf*hf_ca*ica;

    hd = dinf-(dinf-hd)*exp(double(-dt/tau_d));
    hf = finf-(finf-hf)*exp(double(-dt/tau_f));
    hf_ca = finf_ca-(finf_ca-hf_ca)*exp(double(-dt/tau_f_ca));

    return JCa;
}

//////////////////////////////////// SERCA2a uptake current //////////////////////////////////////
////////////////////////////////////
double CCell::comp_iuptake(void)
{
    const double xup = 0.5; // uptake threshold
    double xiup = vup*ci*ci/(ci*ci + xup*xup); //----CHANGED
    return xiup;
}

//////////////////////////////////// leak from the SR //////////////////////////////////////
double CCell::comp_ileak(void)
{
    const double gleak = 0.00002069;
    return gleak*(cj*cj/(cj*cj+50.0*50.0))*(cj*16.667-ci);
}

```

```

////////////////////////////////////// buffer dynamics in the myoplasm ////////////////////////////////////////
//////////////////////////////////////
//buffering to calmodulin and SR are instantaneous, while buffering to
//Troponin C is time dependent. These are important to have reasonable
//Ca transient. Note: we have buffering in the submembrane space and
//the myoplasm.
double CCell::comp_inst_buffer(double c)
{
    const double bcal = 24.0;
    const double xkcal = 7.0;
    const double srmax = 47.0;
    const double srkd = 0.6;
    const double bmem = 15.0;
    const double kmem = 0.3;
    const double bsar = 42.0;
    const double ksar = 13.0;
    double bpx = bcal*xkcal/((xkcal+c)*(xkcal+c));
    double spx = srmax*srkd/((srkd+c)*(srkd+c));
    double mempx = bmem*kmem/((kmem+c)*(kmem+c));
    double sarpx = bsar*ksar/((ksar+c)*(ksar+c));
    return 1.0/(1.0+bpx+spx+mempx+sarpx);
}

////////////////////////////////////// release-load functional dependence ////////////////////////////////////////
//////////////////////////////////////
double CCell::comp_Q(void)
{
    double bv = (cstar-50.0)-av*cstar;
    double Qr;
    if (cjp<50)
        Qr = 0.0;
    else if (cjp>50.0 && cjp<cstar)
        Qr = cjp-50.0;
    else
        Qr = av*cjp+bv;

    return cjp*Qr/cstar;
}

double CCell::comp_dir(double Qr, double JCa, double dcj)
{
    double sparkV = 1/(1.+exp((v+25)/25))/(1+exp(-(v+37)/5));
    double spark_rate = 1.29*fabs(JCa)/gca*sparkV*fspark;
    double alpha = 80.0;
    double dfdt = -alpha*spark_rate + (1-fspark)/500.0;

    fspark += dfdt*dtt;

    return spark_rate*Qr-xir*(1-taur*dcj/cj)/taur;
}

```
