# Supplementary material
Source: PubMed Central journal article supplement (PMC6081959)
Supplement: NIHMS958040-supplement-OneSet_cpp.pdf [file NIHMS958040-supplement-OneSet_cpp.pdf]

```

/*-----
*
* This code is based on the original UCLA model, and is modified
* by CIRCS group of Northeastern University.
*
* Contact Information:
*
* Center for interdisciplinary research on complex systems
* Departments of Physics, Northeastern University
*
* Alain Karma          a.karma (at) northeastern.edu
* Mingwang Zhong      mingwang.zhong (at) gmail.com
*
* The code was used to reproduce simulations in
* Transient outward K+ current (Ito) underlies the right ventricular
* initiation of polymorphic ventricular tachycardia in a transgenic
* rabbit model of long QT type 1, Bum-Rak Choi, Weiyang Li, Dmitry
* Terentyev, Anatoli Kabkov, Mingwang Zhong, Colin M Rees, Radmila
* Terentyeva, Tae Yun Kim, Zhilin Qu, Xuwen Peng, Alain Karma,
* and Gideon Koren (2018).
*----- */

// Information of original UCLA model:
/*----- UCLA Model ver 1.00 -----
*
* Contact Information
*
* Departments of Medicine (Cardiology)
* David Geffen School of Medicine at UCLA
*
* Daisuke Sato          dasato (at) mednet.ucla.edu
* Yohannes Shiferaw     yshiferaw (at) csun.edu
* James N Weiss         JWeiss (at) mednet.ucla.edu
*
* The code was used to produce simulations in
* A. Mahajan, Y. Shiferaw, D. Sato, A. Baher, R. Olcese, L.-H. Xie,
* M.-J. Yang, P.-S. Chen, J. G. Restrepo, A. Karma, A. Garfinkel,
* Z. Qu, and J. N. Weiss, A rabbit ventricular action potential model
* replicating cardiac dynamics at rapid heart rates, Biophysical Journal,
* 94 (2008), pp. 392&410.
*----- */

#include <iostream>
#include <cstdlib>
#include <fstream>
#include <cmath>
#include <queue>

#define __USE_VAR_FOR_CONST
#include "cell.cpp"

using namespace std;

int main( int argc, char** argv)
{
    CCell *cell;
    cell = new CCell; // creat the object with name "cell", with class type "CCell"

    double BCL=4000; // pacing cycle length
    int NBeat = 5 + 15*(BCL<2000); // number of beats before output
    int step_wait = (int)( 200/(cell->getdt()+0.5 ); // waiting time at the beginning, 200ms
    int TotalStep = (int)( BCL*(NBeat+3)/(cell->getdt()+0.5 ) + step_wait;
    int step_lms = (int)( 1/(cell->getdt()+0.5 ); // number of steps in lms
    int step_BCL = BCL*step_lms; // number of steps in 1 BCL
    int step_output = (int)( 1/(cell->getdt()+0.5 ); // number of steps for output

    ofstream currsfile("output.txt",ios::out);

```

```

for (int step=0; step<TotalStep; step++)
{
    double t = step*cell->getdt();
    // Normal pacing or voltage clamp //
    //
    if( argc < 9 ) // normal pacing
    {
        if ( (step-step_wait)%step_BCL < step_lms && (step-step_wait
)>0 )
            cell->Pace(50.0);
        else
            cell->Pace();
    }
    else // voltage clamp
    {
        if ( t < BCL*NBeat+100 )
            cell->PaceVClamp(-50);
        else if ( t < BCL*NBeat+600 )
            cell->PaceVClamp(atof(argv[9]));
        else if ( t < BCL*NBeat+1000 )
            cell->PaceVClamp(0);
        else
            cell->PaceVClamp(-86);
    }

    // output to file //
    //
    if (t>=BCL*NBeat && step%step_output==0)
    {
        // currfile << t-BCL*NBeat << " " << cell->v << " " << endl
        // << cell->ci << " " << cell->cj << endl;

        currfile << t-BCL*NBeat << " " << cell->v << " "
            << cell->_ical << " " << cell->_ikr << " "
            << cell->_itof << " " << cell->_itos << " "
            << cell->_inaca << " " << cell->_inak << " "
            << cell->_ikl << " " << cell->_ina << " "

            << cell->_iks << " " << cell->_svipca << " "
            << cell->_iup << " " << cell->_ir << " "
            << cell->_cs << " " << cell->_ci << " "
            << cell->_cjp << " " << cell->_cj << " "
            << cell->_ica << " " << cell->_fspark << " "

            << cell->_hd << " " << cell->_hf << " "
            << cell->_hf_ca << " " << cell->_IKrO << " "
            << cell->_IKrI << " " << endl;
    }
}

delete cell;
currfile.close();

return 0;
}

```
