# Supplementary material
Source: PubMed Central journal article supplement (PMC6081959)
Supplement: NIHMS958040-supplement-README.pdf [file NIHMS958040-supplement-README.pdf]

# LQT1RVLV

---

This code is an investigation ionic mechanisms that underlie pVT in LQT1 using a transgenic rabbit model of LQT1, described in:

- Transient outward K<sup>+</sup> current (I<sub>to</sub>) underlies the right ventricular initiation of polymorphic ventricular tachycardia in a transgenic rabbit model of long QT type 1, Bum-Rak Choi, Weiyang Li, Dmitry Terentyev, Anatoli Kabkov, Mingwang Zhong, Colin M Rees, Radmila Terentyeva, Tae Yun Kim, Zhilin Qu, Xuwen Peng, Alain Karma, and Gideon Koren (2018).

This code is based on an earlier implementation of a similar model described in:

- A. Mahajan, Y. Shiferaw, D. Sato, A. Baher, R. Olcese, L.-H. Xie, M.-J. Yang, P.-S. Chen, J. G. Restrepo, A. Karma, A. Garfinkel, Z. Qu, and J. N. Weiss, A rabbit ventricular action potential model replicating cardiac dynamics at rapid heart rates, *Biophysical Journal*, 94 (2008), pp. 392–410.

This software is free software, distributed under the 2-clause BSD license. A copy of the license is included in the LICENSE file.

We cordially ask that any published work derived from this code, or utilizing it references the above-mentioned published works.
